# Supplementary material for: Millitesla magnetic field effects on the photocycle of an animal cryptochrome
Source: PubMed Central journal article supplement (PMC5296725; doi:10.1038/srep42228), 2017-02-08
Supplement: srep42228-s1.pdf [file srep42228-s1.pdf]

# Millitesla magnetic field effects on the photocycle of an animal cryptochrome

## Supporting Information

*Dean M. W. Sheppard,<sup>a</sup> Jing Li,<sup>a</sup> Kevin B. Henbest,<sup>a,b</sup> Simon R. T. Neil,<sup>a</sup> Kiminori Maeda,<sup>b,c</sup>*

*Jonathan Storey,<sup>b</sup> Erik Schleicher,<sup>d</sup> Till Biskup,<sup>d</sup> Ryan Rodriguez,<sup>d</sup> Stefan Weber,<sup>d</sup> P. J. Hore,<sup>a\*</sup>*

*Christiane R. Timmel,<sup>b\*</sup> and Stuart R. Mackenzie<sup>a\*</sup>*

<sup>a</sup> Department of Chemistry, University of Oxford, Physical & Theoretical Chemistry Laboratory, Oxford OX1 3QZ, United Kingdom

<sup>b</sup> Department of Chemistry, University of Oxford, Centre for Advanced Electron Spin Resonance, Inorganic Chemistry Laboratory, Oxford OX1 3QR, United Kingdom

<sup>c</sup> Department of Chemistry, Graduate School of Science and Engineering, Saitama University, Saitama, 338-8570, Japan

<sup>d</sup> Institute of Physical Chemistry, Albert-Ludwigs-Universität Freiburg, 79104 Freiburg, Germany

### Corresponding Authors

\*stuart.mackenzie@chem.ox.ac.uk

\*christiane.timmel@chem.ox.ac.uk

\*peter.hore@chem.ox.ac.uk

Keywords: Magnetic field effects, magnetoreception; cryptochrome; radical pair mechanism

## ADDITIONAL EXPERIMENTAL RESULTS

### Transient absorption spectra at early pump-probe delays

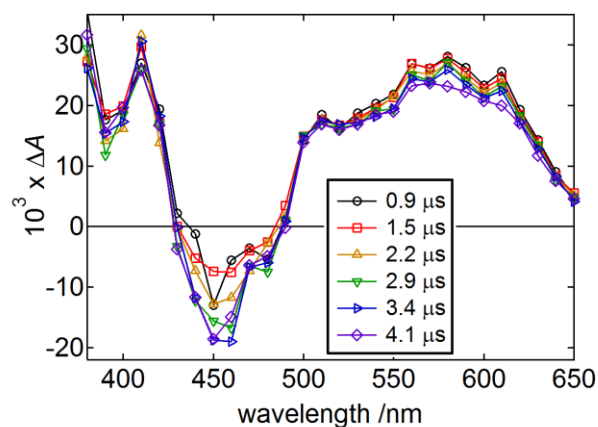

**Figure S1:** Transient absorption spectrum of 60  $\mu\text{M}$  *DmCry* at early times after the photoexcitation pulse ( $< 4 \mu\text{s}$ ), to highlight the clear increase in the signal in the ground state bleach region and the rapid decay component of the  $\text{TrpH}^{++}$  signal (assumed to be dominated by deprotonation). The same sample conditions were employed as in the main text (50 mM HEPES buffer, 100 mM KCl, 50% glycerol, 267 K).

## Magnetic field-dependent transient absorption data

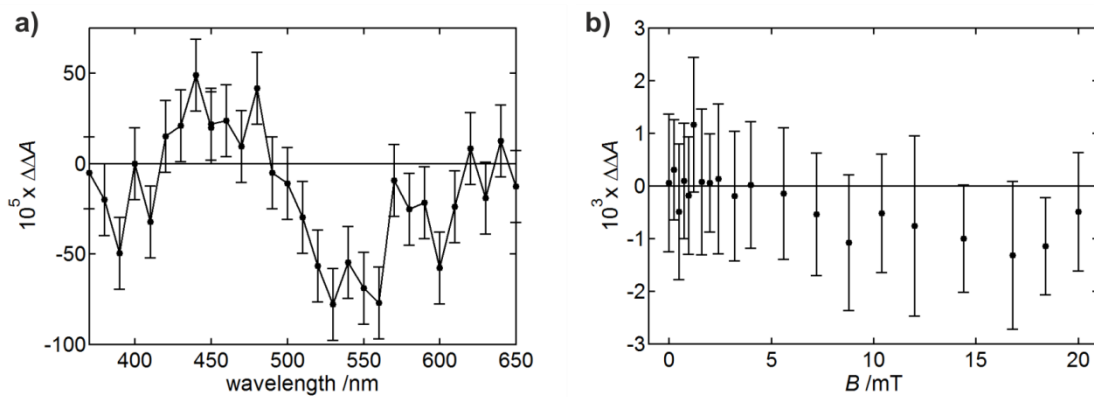

**Figure S2:** (a) Magnetic field effect action spectrum at 22 mT recorded by transient absorption, showing the negative field effect in the radical absorbance region (500 – 650 nm, averaged over the first 80  $\mu$ s after the pump pulse). The protein sample conditions are the same as in the main text (50 mM HEPES buffer, 100 mM KCl, 50% glycerol, 267 K). (b) Magnetic response profile of *DmCry* measured by transient absorption at 560 nm, averaged over the entire (0 – 80  $\mu$ s) decay trace. Data are an average of 16 field-on-minus-field-off measurements at each field strength. The error bars represent one standard deviation. Sample conditions: 50 mM Tris HCl buffer, 100 mM NaCl, 60% glycerol, 265 K. The uncertainties illustrate the challenge presented by detection of this magnetic response by transient absorption. Fig 3 in the main article shows the improvement provided by BBCEAS.

### Dependence of magnetic field effects on glycerol concentration

Figure S3 shows equivalent data to Fig. 2 in the main text but for a lower glycerol concentration (10% v/v here *cf.* 50% elsewhere). The tryptophan radical cation deprotonation (marked in Fig. S3a) is very much quicker leading to a much reduced magnetic response, which is now below the detection limit of the transient absorption experiment (Fig. S3b).

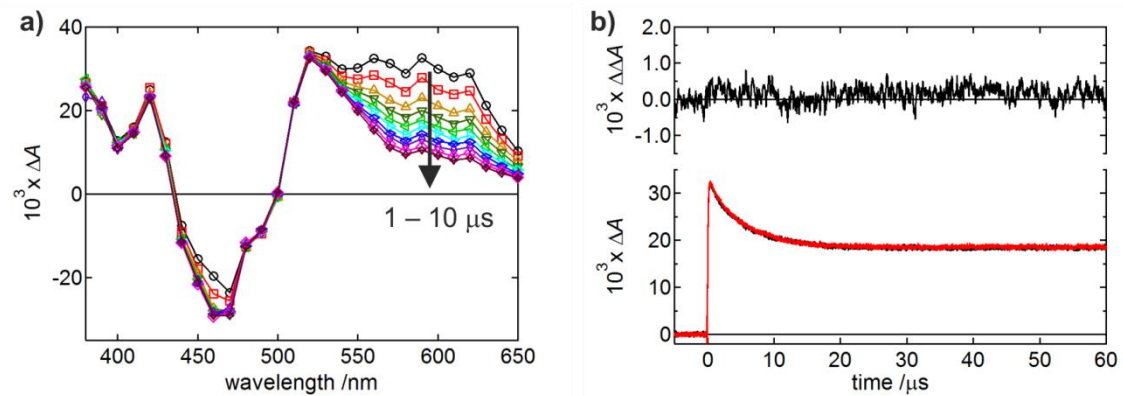

**Figure S3:** (a) *DmCry* transient absorption spectrum in 10% glycerol at 282 K. The rapid  $\text{TrpH}^{*+}$  decay is much faster than in 50% glycerol solution and is essentially complete in 10  $\mu\text{s}$  (*cf.* Fig 2a). (b) *DmCry* decay trace in 10% glycerol averaged over 500–580 nm. In 10% glycerol solution, the field effect cannot be detected by transient absorption, as shown in the upper graph. Sample conditions: 50 mM HEPES buffer, 100 mM KCl, 10% glycerol, 282 K.
